# Supplementary material for: Short electrochemical asymmetric synthesis of (+)-N-acetylcolchinol
Source: Royal Society of Chemistry journal article supplement (doi:10.1039/d2gc02321k), 2022-01-01
Supplement: d2gc02321k1.pdf [file d2gc02321k1.pdf]

# Supporting Information

## Short Electrochemical Asymmetric Synthesis of

### (+)-*N*-Acetylcolchinol

Yi Du,<sup>a</sup> Adelaide Lunga,<sup>a</sup> Aleksandr E. Rubtsov<sup>a,b</sup> and Andrei V. Malkov,<sup>\*,a</sup>

<sup>a</sup> Department of Chemistry, Loughborough University, Loughborough, LE11 3TU, UK.

E-mail: [A.Malkov@lboro.ac.uk](mailto:A.Malkov@lboro.ac.uk)

<sup>b</sup> Department of Chemistry, Perm State University, Bukireva 15, Perm 614990, Russia

## Contents

|                                                                                       |    |
|---------------------------------------------------------------------------------------|----|
| 1. General and Experimental Details.....                                              | 2  |
| 2. General protocol for the electrochemical reduction.....                            | 3  |
| 3. General protocol for the electrochemical oxidative cyclization of acetamide 7..... | 4  |
| 4. General protocol for the electrochemical oxidative cyclization of aniline 16a..... | 5  |
| 5. General protocol for the electrochemical deprotection of 16a.....                  | 6  |
| 6. Synthetic protocols.....                                                           | 7  |
| 7. General protocol for Cyclic Voltammetry .....                                      | 13 |
| 8. <sup>1</sup> H and <sup>13</sup> C-NMR Spectra .....                               | 14 |
| 9. Chiral HPLC traces .....                                                           | 23 |
| References .....                                                                      | 25 |

## 1. General and Experimental Details

The electrochemical reactions were performed using ElectraSyn (IKA) in a constant current mode, unless stated otherwise. Yields are given for isolated products showing one spot on a TLC plate and no impurities detectable in the NMR spectrum. The identity of the products prepared by different methods was checked by comparison of their NMR spectra.

$^1\text{H}$  NMR (400 MHz or 500 MHz) and  $^{13}\text{C}$  NMR (100 or 125 MHz) spectra were recorded at room temperature; the chemical shifts ( $\delta$ ) were measured in ppm with respect to the solvent ( $\text{CDCl}_3$ ,  $^1\text{H}$ :  $\delta = 7.26$  ppm,  $^{13}\text{C}$ :  $\delta = 77.16$  ppm;  $\text{DMSO}-d_6$ ,  $^1\text{H}$ :  $\delta = 2.5$  ppm,  $^{13}\text{C}$ :  $\delta = 39.51$  ppm; or tetramethylsilane (TMS),  $\delta = 0$  ppm). Coupling constants are given in Hertz. Data are reported as follows: chemical shift (in ppm), multiplicity (s = singlet, d = doublet, t = triplet, q = quartet, m = multiplet, br = broad), coupling constant ( $J$ , in Hz), and integration. Various 2D-techniques and DEPT experiments were used to establish the structures and to assign the signals. The high-resolution mass spectra (HRMS) were recorded in a positive or negative ion mode using electrospray ionization (ESI) from methanol or acetonitrile. Enantiomeric excess (ee) was determined by HPLC on columns with chiral sorbents. All chromatographic manipulations used silica gel (40-63  $\mu\text{m}$ ) as the adsorbent.

Melting points were determined on a Kofler block and are uncorrected.

The reaction progress was monitored by GCMS and LCMS analysis and by thin layer chromatography (TLC) on aluminium backed plates with Merck Kiesel 60 F254 silica gel. TLCs were either visualized by UV radiation at a wavelength of 254 nm, or stained by exposure to an ethanolic solution of phosphomolybdic acid.

All solvents and reagents for the reactions were of reagent grade and were used as received without further purification.

## 2. General protocol for the electrochemical reduction

Unsaturated ketone (0.5 mmol) and electrolyte (2 equiv) were added to an undivided 10 mL glass cell equipped with two graphite electrodes, followed by 8 mL of DMSO and 2 mL of MeOH. The mixture was stirred at room temperature for 5 hours under constant current of 10 mA. The progress was monitored by TLC and LCMS. After completion, the reaction mixture was extracted with EtOAc (3x10 mL). The combined organic extracts were dried over anhydrous MgSO<sub>4</sub>, and the solvent was removed under reduced pressure. The resulting mixture was purified by column chromatography on silica gel eluting with a 2:1 mixture of Hexane/EtOAc.

**Table S1. Optimisation of conditions for the reduction of chalcone **12**<sup>a</sup>**

| Entry           | Variation from standard condition                              | Yield <sup>b</sup> of <b>10</b> (%) | Yield <sup>b</sup> of <b>11</b> (%) |
|-----------------|----------------------------------------------------------------|-------------------------------------|-------------------------------------|
| 1               | none                                                           | trace                               | (92)                                |
| 2               | <i>n</i> Bu <sub>4</sub> NI instead of NH <sub>4</sub> SCN     | 52                                  | 42                                  |
| 3               | <i>n</i> Bu <sub>4</sub> NF instead of NH <sub>4</sub> SCN     | 54                                  | 40                                  |
| 4               | Et <sub>4</sub> BF <sub>4</sub> instead of NH <sub>4</sub> SCN | 80                                  | 12                                  |
| 5               | NH <sub>4</sub> OAc instead of NH <sub>4</sub> SCN             | 56                                  | 41                                  |
| 6               | NH <sub>4</sub> Cl instead of NH <sub>4</sub> SCN              | 60                                  | 38                                  |
| 7               | DCM as solvent                                                 | NR                                  | NR                                  |
| 8               | DMF as solvent                                                 | NR                                  | NR                                  |
| 9               | MeOH as solvent                                                | NR                                  | NR                                  |
| 10              | CH <sub>3</sub> CN as solvent                                  | 95 (92)                             | trace                               |
| 11              | CH <sub>3</sub> CN anhydrous as solvent                        | 93                                  | trace                               |
| 12              | DMF as solvent                                                 | 98                                  | trace                               |
| 13              | DMF anhydrous as solvent                                       | 94                                  | trace                               |
| 14              | MeOH: H <sub>2</sub> O (1:4) as solvent                        | NR                                  | NR                                  |
| 15              | DMSO: MeOH (1:4) as solvent                                    | 21                                  | 20                                  |
| 16              | DMSO: MeOH (1:1) as solvent                                    | 20                                  | 23                                  |
| 17              | DMSO: MeOH (2:1) as solvent                                    | 32                                  | 62                                  |
| 18              | Ni (+)/Ni (-) as electrodes                                    | 92 (82)                             | trace                               |
| 19              | C (+)/Ni (-) as electrodes                                     | 50                                  | trace                               |
| 20              | C (+)/Fe (-) as electrodes                                     | 68                                  | trace                               |
| 21 <sup>c</sup> | Scale up reaction                                              | 56                                  | 35                                  |

<sup>a</sup>Reaction conditions: Carbon plate anode, Carbon plate cathode, substrate 0.2 mmol, 5 equiv of electrolyte in 10 mL of DMSO/MeOH (4:1), constant current (10 mA), undivided cell, reaction time 5 hours. <sup>b</sup>Conversions by LCMS (isolated yields given in parentheses). <sup>c</sup>Carbon plate anode, Carbon plate cathode, 10 mmol chalcone **12**, 5 equiv NH<sub>4</sub>SCN in 500 mL of DMSO/MeOH (4:1), constant current (10 mA), undivided cell, reaction time 5 hours.

### 3. General protocol for the electrochemical oxidative cyclization of acetamide **7**

A 15 mL undivided cell was charged with with acetamide **7** (0.0359 g, 0.1 mmol) in 7 mL of acetonitrile, electrolyte (20 mmol%), TFAA (13  $\mu$ L, 1 equiv) and additive (7.6  $\mu$ L, 1 equiv). The cell was equipped with two graphite electrodes and a constant current of 15 mA was applied; the mixture was stirred at room temperature for 4 hours. The process was monitored by TLC. After completion, a saturated aqueous solution of NaHCO<sub>3</sub> was added to the mixture, which was then extracted with EtOAc (3x10 mL). The combined organic extracts were dried over anhydrous MgSO<sub>4</sub>, concentrated in vacuum and purified by chromatography on silica eluting with a 30:1 mixture of DCM/MeOH to give the title compound as an off-white solid.

**Table S2. Optimisation of the oxidative coupling of **7**<sup>a</sup>**

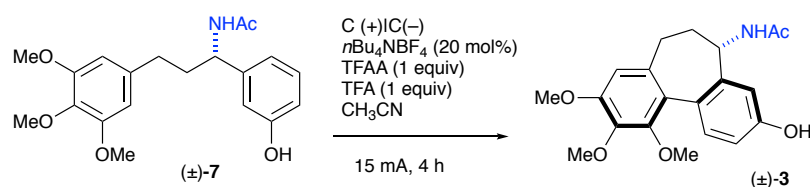

| Entry           | Variation from standard condition                                                                                 | Yield <sup>b</sup> of <b>3</b> (%) |
|-----------------|-------------------------------------------------------------------------------------------------------------------|------------------------------------|
| 1               | none                                                                                                              | 68                                 |
| 2               | <i>n</i> Bu <sub>4</sub> NI instead of <i>n</i> Bu <sub>4</sub> NBF <sub>4</sub>                                  | trace                              |
| 3               | <i>n</i> Bu <sub>4</sub> NBr instead of <i>n</i> Bu <sub>4</sub> NBF <sub>4</sub>                                 | trace                              |
| 4               | <i>n</i> Bu <sub>4</sub> NHSO <sub>4</sub> instead of <i>n</i> Bu <sub>4</sub> NBF <sub>4</sub>                   | trace                              |
| 5               | <i>n</i> Bu <sub>4</sub> NF instead of <i>n</i> Bu <sub>4</sub> NBF <sub>4</sub>                                  | 28                                 |
| 6               | DCM as solvent                                                                                                    | 32                                 |
| 7               | <i>i</i> PrOH as solvent                                                                                          | NR                                 |
| 8               | MeOH as solvent                                                                                                   | trace                              |
| 9               | THF as solvent                                                                                                    | NR                                 |
| 10              | HIFP as solvent                                                                                                   | NR                                 |
| 11              | Without TFAA and TFA                                                                                              | 46                                 |
| 12              | TFA instead of TFAA                                                                                               | 22                                 |
| 13              | H <sub>2</sub> O <sub>2</sub> instead of TFAA                                                                     | trace                              |
| 14              | H <sub>2</sub> O instead of TFAA                                                                                  | NR                                 |
| 15              | Without TFAA                                                                                                      | 21                                 |
| 16              | Without TFA                                                                                                       | 59                                 |
| 17              | Glassy Carbon plate electrodes                                                                                    | 54                                 |
| 18              | Cu <sub>2</sub> O (50 mol%) as additive                                                                           | 52                                 |
| 19 <sup>c</sup> | CH <sub>3</sub> CN/H <sub>2</sub> O (9:1), Na <sub>2</sub> SO <sub>4</sub> (1 equiv), Cu <sub>2</sub> O (50 mol%) | <5                                 |
| 20              | CH <sub>3</sub> CN, Na <sub>2</sub> SO <sub>4</sub> (1 equiv), Cu <sub>2</sub> O (50 mol%)                        | 10                                 |

<sup>a</sup>Reaction conditions: Carbon plate anode, Carbon plate cathode, substrate 0.1 mmol, 20 mol% of electrolyte in 7 mL of solvent, constant current (15 mA), additive 1.0 equiv, undivided cell, reaction time 4 hours.

<sup>b</sup>Isolated yield. <sup>c</sup>Standard conditions from Table S3 were used.

#### 4. General protocol for the electrochemical oxidative cyclization of aniline **16a**

Sodium sulphate (0.0142 g, 1 equiv) was added to the solution of **16** (0.0424 g, 0.1 mmol) in 18 mL of acetonitrile and 2 mL of water in an undivided electrochemical cell. Then, copper(I) oxide (0.0071 g, 50 mol%) was added, the setup was equipped with two carbon plate electrodes; the mixture was electrolysed under constant current (7 mA) for 5 hours. After completion, the reaction mixture was extracted with ethyl acetate (3x20 mL). The combined organic layers were dried over anhydrous magnesium sulfate, concentrated under reduced pressure and purified by column chromatography on silica eluting with a 3:1 mixture of hexane: ethyl acetate to give the title product as a thick brown oil.

**Table S3. Optimisation of the oxidative coupling of **16a**<sup>a</sup>**

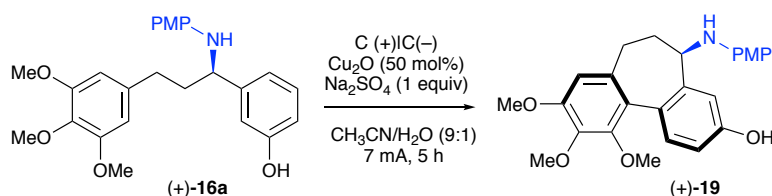

| Entry | Variation from standard conditions                                        | Yield <sup>b</sup>    |
|-------|---------------------------------------------------------------------------|-----------------------|
| 1     | none                                                                      | 82 (74 <sup>c</sup> ) |
| 2     | CuSO <sub>4</sub> instead of Cu <sub>2</sub> O                            | 50                    |
| 3     | Cu instead of Cu <sub>2</sub> O                                           | NR                    |
| 4     | CuCl instead of Cu <sub>2</sub> O                                         | 56                    |
| 5     | CuBr instead of Cu <sub>2</sub> O                                         | 60                    |
| 6     | [Cu(MeCN) <sub>4</sub> ]BF <sub>4</sub> of Cu <sub>2</sub> O              | 53                    |
| 7     | NaClO <sub>4</sub> instead of Cu <sub>2</sub> O                           | NR                    |
| 8     | With triflic acid                                                         | 70 (56 <sup>c</sup> ) |
| 9     | Without H <sub>2</sub> O                                                  | 20                    |
| 10    | K <sub>2</sub> SO <sub>4</sub> instead of Na <sub>2</sub> SO <sub>4</sub> | 76 (63 <sup>c</sup> ) |
| 11    | Pt/Pt instead of C/C                                                      | 48                    |
| 12    | Cu/Cu instead of C/C                                                      | NR                    |

<sup>a</sup> Carbon plate anode, Carbon plate cathode, 0.1 mmol of **16a**, electrolyte 1 equiv, additive 50 mol%, acid 3 equiv, solvent CH<sub>3</sub>CN/H<sub>2</sub>O 9:1, current 7 mA; <sup>b</sup> conversion based on LC-MS; <sup>c</sup> isolated yield.

## 5. General protocol for the electrochemical deprotection of **16a**

In a divided electrochemical glass cell, the protected amine **16a** (0.0422 g, 0.1 mmol) dissolved in the mixture of CH<sub>3</sub>CN (9 mL) and triflic acid (13  $\mu$ L, 3 equiv) was loaded in the anode chamber. The cathode chamber was charged with a solution of NaClO<sub>4</sub> (0.0610 g, 10 equiv) in CH<sub>3</sub>CN (9 mL) and 2 mL of water. The cell was equipped with two carbon plate electrodes, the potential was maintained at constant voltage of 0.85 V for 20 hours at room temperature. The process was monitored by TLC and LCMS. Upon completion, most of the organic solvent was removed under reduced pressure; a 0.1N aqueous HCl was added dropwise to adjust pH to 3.5. After that, the aqueous solution was washed with DCM (20 mL), the mixture was made alkaline (0.1N NaOH) and then extracted with ethyl acetate (3x20 mL). The combined organic layers were dried over anhydrous MgSO<sub>4</sub> and the solvent was removed under reduced pressure to afford primary amine as a white solid, which was used in the next step without additional purification.

**Table S4. Optimisation of deprotection of **16a**<sup>a</sup>**

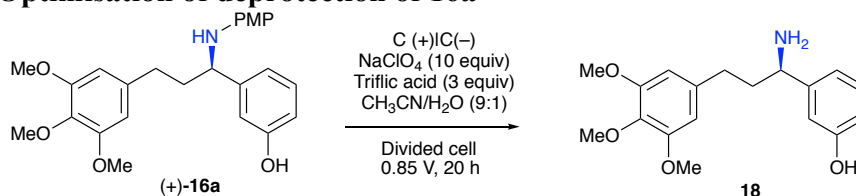

| Entry | Variation from standard condition                      | Yield <sup>b</sup>   |
|-------|--------------------------------------------------------|----------------------|
| 1     | none                                                   | 76(70 <sup>c</sup> ) |
| 2     | TFA instead of triflic acid                            | trace                |
| 3     | HCl instead of triflic acid                            | NR                   |
| 4     | H <sub>2</sub> SO <sub>4</sub> instead of triflic acid | NR                   |
| 6     | CuSO <sub>4</sub> as additive                          | 50 <sup>c</sup>      |
| 7     | Without triflic acid                                   | NR                   |
| 8     | Without H <sub>2</sub> O                               | NR                   |
| 9     | Pt (+)/Pt (-) instead of C (+)/C(+)                    | 30                   |

<sup>a</sup> Carbon plate anode, Carbon plate cathode in a divided cell, 0.1mmol of **16a**, additive 50 mol%, acid 3 equiv, 20 mL of solvent CH<sub>3</sub>CN/H<sub>2</sub>O 9:1, voltage 0.85 V, reaction time 20 hours, rt; <sup>b</sup>Conversion based on LC-MS; <sup>c</sup>isolated yield.

## 6. Synthetic protocols

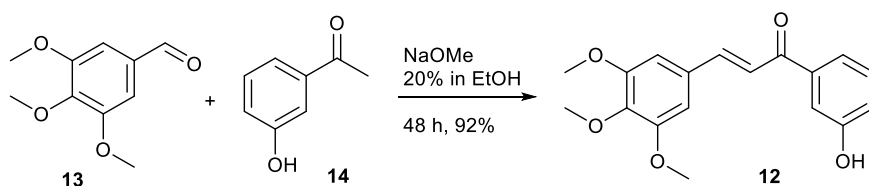

**(*E*)-1-(3-hydroxyphenyl)-3-(3,4,5-trimethoxyphenyl)prop-2-en-1-one<sup>S1</sup> (**12**).** A solution of NaOH (260 mg, 6.5 mmol, 1.3 equiv) in water (10 mL) was added to a solution of 3-hydroxyacetophenone (0.69 g, 5 mmol) in ethanol (6 mL). Then, 3,4,5-trimethoxybenzaldehyde (0.98 g, 5 mmol, 1.0 equiv) was added portion-wise to the resulting mixture at 0 °C with stirring.

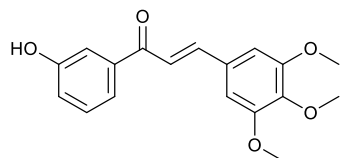

The mixture was allowed to warm to room temperature and stirred for 48 hours. After completion of the reaction (as indicated by TLC), the mixture was poured onto crushed ice and acidified with a dilute HCl, the precipitate formed was separated by filtration under suction and washed until the filtrate showed neutral pH. The solid was recrystallized from EtOH to give the title compounds as a yellow solid (1.44 g, yield 92%). M.p. = 175-177 °C (Lit. 174-176 °C),  $R_f$  = 0.2 (hexane/ethyl acetate 5:1). <sup>1</sup>H NMR (500 MHz, DMSO-*d*<sub>6</sub>) δ 3.68 (s, 3H), 3.82 (s, 6H), 7.03 (m, 1H), 7.18 (s, 2H), 7.34 (m, 1H), 7.44 (m, 1H), 7.59 (m, 1H), 7.63 (d, *J* = 15.6 Hz, 1H), 7.77 (d, *J* = 15.6 Hz, 1H), 9.76 (s, 1H); <sup>13</sup>C NMR (126 MHz, DMSO-*d*<sub>6</sub>) δ 56.0, 60.0, 106.4, 114.5, 119.4, 120.0, 121.3, 129.6, 130.1, 139.0, 139.6, 144.2, 153.0, 157.6, 189.0. IR ν 3219, 2998, 2943, 2828, 1648, 1573, 1502, 1459, 1416 cm<sup>-1</sup>. The data are in agreement with literature.<sup>S1</sup>

**3-(1-hydroxy-3-(3,4,5-trimethoxyphenyl)propyl)phenol (**11**).** To an undivided 10 mL glass cell, unsaturated ketone **12** (63.2 mg, 0.2 mmol) and NH<sub>4</sub>SCN (5 equiv, 76 mg) were added, followed by 8 mL of DMSO and 2 mL of MeOH. The cell was equipped with two carbon plate electrodes. The constant current (10 mA) electrolysis was performed at room temperature for

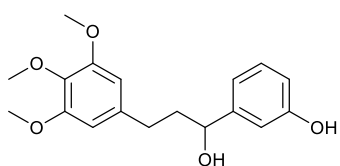

5 hours. The reaction mixture was extracted with EtOAc (3x10 mL). The combined organic layers were dried over anhydrous MgSO<sub>4</sub>, and the solvent was removed under reduced pressure. The resulting mixture was purified by column chromatography on silica gel eluting with Hexane/EtOAc (2:1) to afford **11** (58 mg) of as a white solid. Yield 92%, M.p. = 136.8-137.3 °C.  $R_f$  = 0.45 (hexane/ethyl acetate 1:1). <sup>1</sup>H NMR (400 MHz, DMSO-*d*<sub>6</sub>) δ 1.87 (q, *J* = 7.7 Hz, 2H), 2.59 (m, 2H), 3.62 (s, 3H), 3.74 (s, 6H), 4.46 (q, *J* = 6.0 Hz, 1H), 5.19 (d, *J* = 4.3 Hz, 1H), 6.47 (s, 2H), 6.63 (m, 1H), 6.75 (m, 1H), 6.79 (s, 1H), 7.10 (m, 1H), 9.27 (s, 1H); <sup>13</sup>C NMR (101 MHz, DMSO-*d*<sub>6</sub>) δ 32.1, 40.9, 55.8, 60.0, 71.8, 105.4, 112.8, 113.6, 116.6, 129.0, 135.5, 137.9, 147.8,

152.8, 157.2. IR  $\nu$  3452, 3258, 2963, 2935, 2835, 1591, 1507, 1451, 1419  $\text{cm}^{-1}$ . HRMS:  $[\text{C}_{18}\text{H}_{22}\text{NaO}_5]^+ [\text{M}+\text{Na}]^+$ : calculated 341.1359; found 341.1359.

**1-(3-hydroxyphenyl)-3-(3,4,5-trimethoxyphenyl)propan-1-one (10).** Obtained by the general

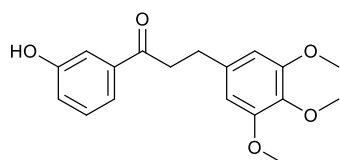

procedure using MeCN as a solvent. Yield 92%, 0.1453g. M.p. = 142.2-142.5  $^{\circ}\text{C}$ .  $R_f$  = 0.2 (Hexane/Ethyl acetate 5:1).  $^1\text{H}$  NMR (500 MHz,  $\text{DMSO}-d_6$ )  $\delta$  2.86 (t,  $J$  = 7.6 Hz, 2H), 3.30 (t,  $J$  = 7.6 Hz, 2H), 3.62 (s, 3H), 3.75 (s, 6H), 6.58 (s, 2H), 7.02 (m, 1H), 7.31 (m, 1H),

7.34 (m, 1H), 7.45 (m, 1H), 9.75 (s, 1H);  $^{13}\text{C}$  NMR (126 MHz,  $\text{DMSO}-d_6$ )  $\delta$  30.0, 55.8, 59.9, 105.7, 114.1, 118.9, 120.2, 129.8, 135.7, 136.9, 138.1, 152.7, 157.6, 199.2. The data are in agreement with literature.<sup>1</sup>

**N-(1-(3-hydroxyphenyl)-3-(3,4,5-trimethoxyphenyl)propyl)acetamide (7).** A 25 mL round-

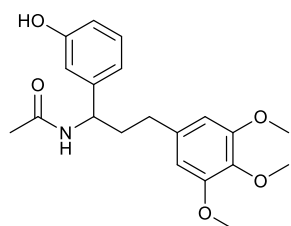

bottomed flask was charged with 3-(1-hydroxy-3-(3,4,5-trimethoxyphenyl)propyl)phenol (1.59 g, 5 mmol) in a 1.5 mL of acetonitrile and 0.3 mL of water. The mixture was cooled on an ice bath followed by a slow addition of sulfuric acid (0.15 mL). The ice bath was removed, and the mixture was stirred at room temperature for 36 hours.

After the reaction was completed, the mixture was quenched by adding 2.5 mL of a 50% aqueous NaOMe. Then, it was extracted with DCM (3x10 mL). The combined organic layers were passed through a plug of anhydrous magnesium sulfate, concentrated under reduced pressure and purified by a short column chromatography on silica gel eluting with EtOAc to afford the title compound as a white solid (1.31 g). Yield 73%, M.p. = 53-54  $^{\circ}\text{C}$ .  $R_f$  = 0.32 (ethyl acetate).  $^1\text{H}$  NMR (500 MHz,  $\text{DMSO}-d_6$ )  $\delta$  1.87 (s, 3H), 1.91 (m, 1H), 2.47 (m, 1H), 2.54 (m, 1H), 3.62 (s, 3H), 3.74 (s, 6H), 4.68 (q,  $J$  = 8.5 Hz, 1H), 6.46 (s, 2H), 6.62 (m, 1H), 6.69 (m, 2H), 7.09 (m, 1H), 8.28 (m, 1H), 9.33 (s, 1H);  $^{13}\text{C}$  NMR (126 MHz,  $\text{DMSO}-d_6$ )  $\delta$  22.7, 32.9, 37.7, 51.9, 55.7, 59.9, 105.5, 113.5, 113.6, 117.1, 129.2, 135.5, 137.2, 145.3, 152.7, 157.3, 168.5. IR  $\nu$  3423, 3238, 3080, 2938, 1593, 1508, 1457, 1420. HRMS:  $[\text{C}_{20}\text{H}_{25}\text{NaNO}_5]^+ [\text{M}+\text{Na}]^+$ : calculated 382.1625; found: 382.1624.

**(±)-N-(3-hydroxy-9,10,11-trimethoxy-6,7-dihydro-5H-dibenzo[a,c][7]annulen-5-**

**yl)acetamide (3).** Acetamide **7** (35.9 mg, 0.1 mmol) in a 7 mL of acetonitrile, *n*Bu<sub>4</sub>NBF<sub>4</sub> (0.0043 g, 20 mmol%), TFAA (13.8 μL, 1 equiv) and TFA (7.6 μL, 1 equiv) were added to a 15 mL undivided glass cell equipped with carbon plate electrodes; the mixture was electrolised under constant current of 15 mA at room temperature for 4 hours. The process was monitored by TLC and LCMS. After completion, aqueous solution of NaHCO<sub>3</sub> was added to the mixture, which was extracted with ethyl acetate (3x10 mL). The combined organic extracts were dried over anhydrous MgSO<sub>4</sub>, concentrated under reduced pressure and purified by column chromatography on silica eluting with a 30:1 mixture of DCM/MeOH to give the product as an off-white solid, 24.3 mg (68%). <sup>1</sup>H NMR (400 MHz, DMSO-*d*<sub>6</sub>) 1.87 (m, 4H), 2.09 (m, 2H), 2.46 (s, 1H), 3.45 (s, 3H), 3.76 (s, 3H), 3.81 (s, 3H), 4.45 (m, 1H), 6.68 (m, 1H), 6.74 (m, 2H), 7.11 (m, 1H), 8.32 (m, 1H), 9.38 (s, 1H). <sup>13</sup>C NMR (101 MHz, DMSO-*d*<sub>6</sub>) δ 22.6, 30.1, 38.4, 48.1, 55.8, 60.4, 60.5, 108.0, 110.2, 112.9, 124.4, 124.7, 130.4, 134.7, 140.5, 141.7, 150.3, 151.8, 156.4, 168.2. The data are in agreement with literature.<sup>S2</sup>

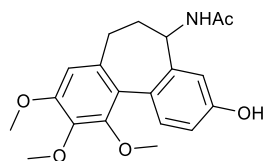

**3-(1-((4-methoxyphenyl)imino)-3-(3,4,5-trimethoxyphenyl)propyl)phenol (15a). 5Å**

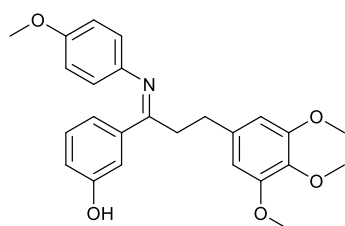

molecular sieves (7.25 g) were added to a solution of **10** (1.688 g, 4 mmol) and *p*-anisidine (0.7688 g, 1.05 equiv) in 25 mL of anhydrous toluene. The solution was heated to reflux with a Dean-Stark adapter for 72 hours. The hot reaction mixture was filtered from the sieves, the solvent was removed under reduced pressure and the residue was purified by flash chromatography of a short silica gel column with a 2:1 mixture of hexane/ethyl acetate to give the title compound as a yellow solid. It can also be used directly in the next step, without further purification. Yield 82%, <sup>1</sup>NMR (500 MHz, DMSO-*d*<sub>6</sub>) δ 2.82 (t, *J* = 7.6 Hz, 2H), 3.23 – 3.29 (t, *J* = 7.6 Hz, 2H), 3.57 (s, 3H), 3.58 (s, 3H), 3.71 (s, 6H), 6.49 – 6.45 (m, 2H), 6.54 (s, 2H), 6.61 – 6.58 (m, 2H), 6.98 (ddd, *J* = 8.1, 2.5, 0.9 Hz, 1H), 7.27 (t, *J* = 7.9 Hz, 1H), 7.30 (dd, *J* = 2.3, 1.7 Hz, 1H), 7.41 (ddd, *J* = 7.7, 1.5, 1.0 Hz); <sup>13</sup>C NMR (125 MHz, DMSO-*d*<sub>6</sub>) δ 30.56, 55.79, 56.29, 60.45, 106.20, 114.62, 115.01, 115.49, 119.47, 120.70, 130.29, 136.21, 137.47, 138.61, 142.82, 151.21, 153.23, 158.13, 199.73.

**(+)-3-(1-((4-methoxyphenyl)amino)-3-(3,4,5-trimethoxyphenyl)propyl)phenol (16a).**

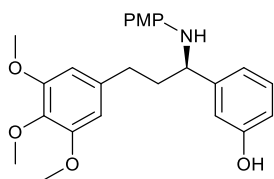

Trichlorosilane (70  $\mu$ L, 3 equiv) was added dropwise to a solution of imine **15a** (0.0848 g, 0.2 mmol) and catalyst **17a** (5 mg, 5 mol%) in an anhydrous toluene (2 mL) at -30  $^{\circ}$ C, the reaction mixture was stirred at -30  $^{\circ}$ C for 4 hours. Then it was quenched with a saturated solution of  $\text{NaHCO}_3$  (10 mL) and the resulting mixture was extracted with ethyl acetate (3x20 mL). The combined extracts were washed with brine and dried over anhydrous  $\text{MgSO}_4$ . The solvent was removed under reduced pressure and the residue was purified by column chromatography on silica gel eluting with hexane/EtOAc (3:1) to give **16a** as a white solid. Yield 0.077g, 91%, M.p = 178.6 $^{\circ}$ C,  $R_f$  = 0.08 (Hexane: Ethyl acetate 3:1);  $[\alpha]_D = +40$  (c 1.0,  $\text{CHCl}_3$ );  $^1\text{H}$  NMR (400 MHz,  $\text{DMSO}-d_6$ )  $\delta$  1.81 – 1.99 (m, 2H), 2.49 – 2.67 (m, 2H), 3.53 (s, 3H), 3.57 (s, 3H), 3.66 (s, 6H), 4.09 – 3.98 (m, 1H), 5.71 (d,  $J$  = 7.4 Hz, 1H), 6.39 (s, 1H), 6.41 (s, 3H), 6.50 – 6.54 (m, 1H), 6.55 – 6.59 (m, 2H), 6.71 (dd,  $J$  = 9.9, 4.9 Hz, 2H), 7.02 (t,  $J$  = 7.8 Hz, 1H), 9.18 (s, 1H);  $^{13}\text{C}$  NMR (101 MHz,  $\text{DMSO}-d_6$ )  $\delta$  33.21, 40.53, 55.81, 56.19, 57.49, 60.48, 105.97, 113.75, 113.96, 114.07, 114.98, 117.80, 129.65, 136.02, 138.05, 142.99, 147.34, 150.97, 153.21, 157.85. HPLC analysis [Chiralpak IC, hexane / propan-2-ol (65:35), 0.75 mL/min,  $t_{\text{minor}}$  = 19.40 min,  $t_{\text{major}}$  = 22.30 min] showed 99 % ee. HRMS:  $[\text{C}_{25}\text{H}_{27}\text{NNaO}_5]^+ [\text{M}+\text{Na}]^+$ : calculated 446.1943; found 446.1938.

**Kenamide (+)-17.** The catalysts was synthesized following the literature method.<sup>SP3</sup> Yield 80%,

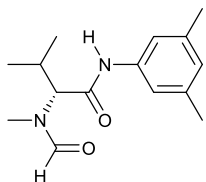

M.p = 101.4 $^{\circ}$ C,  $R_f$  = (hexane/ethyl acetate 3:1),  $[\alpha]_D = +19.0$  (c 1.0,  $\text{CHCl}_3$ );  $^1\text{H}$  NMR (400 MHz,  $\text{CDCl}_3$ )  $\delta$  0.89 (s, 3H), 1.04 (d,  $J$  = 6.5 Hz, 3H), 2.26 (s, 6H), 2.44 (dt,  $J$  = 19.6, 6.6 Hz, 1H), 2.99 (s, 3H), 4.41 (dd,  $J$  = 11.2, 3.7 Hz, 1H), 6.74 (d,  $J$  = 9.0 Hz, 1H), 7.14 (d,  $J$  = 8.2 Hz, 2H), 8.13 (s, 1H), 8.17 (s, 1H);  $^{13}\text{C}$  NMR (101 MHz,  $\text{CDCl}_3$ )  $\delta$  18.66, 19.62, 21.39, 25.37, 31.64, 63.23, 117.74, 126.25, 137.61, 138.77, 164.04, 167.30.<sup>S3</sup>

**(+)-3-(1-amino-3-(3,4,5-trimethoxyphenyl)propyl)phenol (7).** In a divided electrochemical

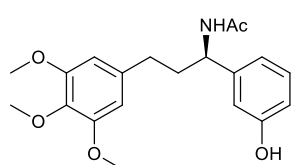

glass cell, amine **16a** (0.0422 g, 0.1 mmol) was dissolved in a mixture of  $\text{CH}_3\text{CN}$  (9 mL) and triflic acid (13  $\mu$ L, 3 eq) in the anode chamber. The cathode chamber was charged with a solution of  $\text{NaClO}_4$  (0.1220 g, 10 equiv) in  $\text{CH}_3\text{CN}$  (9 mL) and 2 mL of water. The cell was equipped with two carbon plate electrodes, the potential was maintained at constant voltage of 0.85 V for 20 hours at room temperature. The process was monitored by TLC and LCMS. After completion,

most of the organic solvent was removed under reduced pressure; a 0.1N aqueous HCl was added dropwise to adjust pH to 3.5. Then, the aqueous solution was washed with DCM (20 mL), the mixture was made alkaline (0.1N NaOH) and extracted with ethyl acetate (3x20 mL). The combined organic layers were dried over MgSO<sub>4</sub>, and the solvent was removed under reduced pressure to afford primary amine as an off-white solid (0.0221 g), which used for the next step without additional purification. It was dissolved in DCM (2 mL) in a round-bottomed flask, followed by a dropwise addition of acetic anhydride (7.8  $\mu$ L, 1.2 eq) under stirring, the mixture was left stirring at room temperature for 20 minutes. After that, the reaction mixture was treated with a saturated solution of Na<sub>2</sub>CO<sub>3</sub> (10 mL), the organic phase then washed by three times with water and dried over anhydrous MgSO<sub>4</sub>. The solvent was removed under reduced pressure to afford the title compound as a light-yellow solid. Yield 0.0222 g, 62%, [ $\alpha$ ]<sub>D</sub> = + 42 (c 0.5, CHCl<sub>3</sub>). <sup>1</sup>H NMR spectrum matched that of racemic sample 7.

**(+)-9,10,11-trimethoxy-5-((4-methoxyphenyl)amino)-6,7-dihydro-5H-dibenzo-**

**[a,c][7]annulen-3-ol (19).** Na<sub>2</sub>SO<sub>4</sub> (0.0142 g, 1 equiv) was added to a solution of **16a** (0.0424 g,

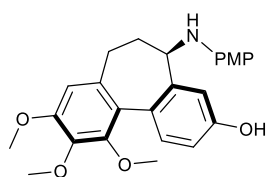

0.1 mmol) in 18 mL acetonitrile and 2 mL water in an undivided cell, followed by the addition of copper(I) oxide (0.0071 g, 50 mol%). The mixture was equipped with carbon plate electrodes and electrolysed under a constant current of 7 mA for 5 hours. After the reaction was complete, the

mixture was extracted with ethyl acetate (3x20 mL). The combined organic layers were dried over anhydrous MgSO<sub>4</sub>, concentrated under reduced pressure and purified by column chromatography on silica eluting with a 3:1 mixture of hexane: ethyl acetate to give the title product as a thick brown oil. Yield 0.0312g, 74%. *R*<sub>f</sub> = 0.29 (hexane/ethyl acetate 3:1); [ $\alpha$ ]<sub>D</sub> = +293 (c 1.0, CHCl<sub>3</sub>); <sup>1</sup>H NMR (400 MHz, DMSO-*d*<sub>6</sub>) 1.85 (dd, *J* = 13.1, 5.8 Hz, 1H), 2.14 (dt, *J* = 9.9, 5.6 Hz, 1H), 2.40 – 2.43 (m, 1H), 2.51 – 2.57 (m, 1H), 3.44 (s, 3H), 3.63 (d, *J* = 1.8 Hz, 6H), 3.69 (s, 3H), 4.54 (q, *J* = 5.3 Hz, 1H), 6.47 (s, 1H), 6.55 (dd, *J* = 7.9, 1.4 Hz, 1H), 6.64 (d, *J* = 9.1 Hz, 2H), 6.71 (d, *J* = 9.1 Hz, 2H), 6.76 (d, *J* = 6.6 Hz, 2H), 7.07 – 7.02 (m, 1H), 9.23 (s, 1H); <sup>13</sup>C NMR (101 MHz, DMSO-*d*<sub>6</sub>)  $\delta$  24.89, 28.30, 31.23, 55.67, 56.24, 59.85, 60.94, 64.89, 107.68, 113.69, 113.93, 114.35, 117.19, 121.88, 126.38, 129.77, 130.17, 141.52, 145.87, 145.93, 146.80, 148.59, 154.49, 157.89. HRMS: [C<sub>25</sub>H<sub>27</sub>NNaO<sub>5</sub>]<sup>+</sup> [M+Na]<sup>+</sup>: calculated 444.1787; found 444.1782.

(+)- *N*-Acetylcolchinol (**3**). In a divided glass cell, amine **19** (42 mg, 0.1 mmol) dissolved in a

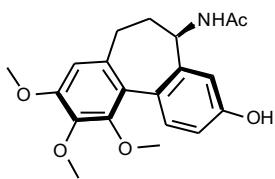

mixture of CH<sub>3</sub>CN (9 mL) and triflic acid (13  $\mu$ L, 3 equiv) was loaded into the anode chamber. The cathode chamber was charged with a solution of NaClO<sub>4</sub> (61 mg, 10 equiv) in CH<sub>3</sub>CN (9 mL) and 2 mL of water. The cell was equipped with two carbon plate electrodes, the potential was

maintained at a constant voltage of 0.7 V for 15 hours at room temperature. Most of the organic solvent was removed under reduced pressure; a 0.1N aqueous HCl was added dropwise to adjust pH to 3.5. Then, the aqueous solution was washed with DCM (20 mL), the mixture was made alkaline (0.1N NaOH) and extracted with ethyl acetate (3x20 mL). The combined organic layers were dried over MgSO<sub>4</sub>, and the solvent was removed under reduced pressure to afford primary amine as a white solid, which was dissolved in DCM (2 mL) in a round bottomed flask, followed by a dropwise addition of acetic anhydride (7.8  $\mu$ L, 1.2 equiv) under stirring. The mixture was left stirring at room temperature for 8 h. After that, the reaction mixture was treated with a saturated solution of Na<sub>2</sub>CO<sub>3</sub> (10 mL), the organic phase then washed three times with water and dried over anhydrous MgSO<sub>4</sub>. The solvent was removed under reduced pressure to afford the title product as a white solid. Yield 0.0249 g, 70%.  $[\alpha]_D = +48.2$  (c 0.5, CHCl<sub>3</sub>) (Lit:<sup>S2</sup>  $[\alpha]_D = -55.8$  (c 0.135, CHCl<sub>3</sub>)). <sup>1</sup>H NMR spectrum matched that of racemic sample **3**.

## 7. General protocol for Cyclic Voltammetry

Cyclic voltammetry was recorded using a Princeton Applied Research VersaSTAT 3. A glassy carbon disk, Pt wire, and Ag/Ag<sup>+</sup> (AgNO<sub>3</sub> in acetonitrile) were used as the working, counter, and reference electrodes, respectively. Anhydrous acetonitrile was used as the solvent with 10 mM [NBu<sub>4</sub>][BF<sub>4</sub>] as supporting electrolyte. The solution was deoxygenated by bubbling with Ar as appropriate and experiments were run under a blanket of Ar. The CV curves of linear acetamide **7** and *N*-acetylcolchokol **3** are shown in Figure S1.

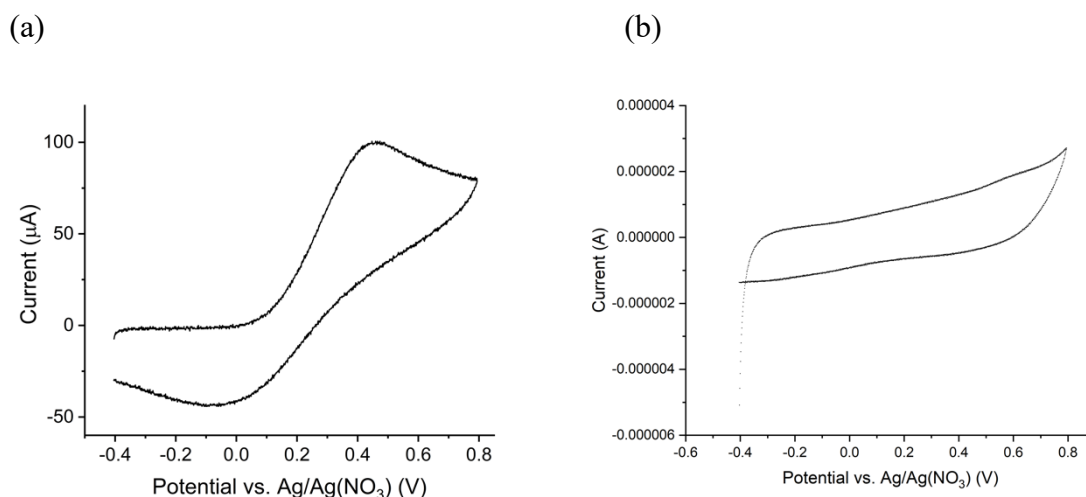

**Figure S1. The redox behaviour of (a) acetamide **7** and (b) *N*-acetylcolchokol **3**.**

## 8. $^1\text{H}$ and $^{13}\text{C}$ -NMR Spectra

### 3, $^1\text{H}$ NMR (400 MHz, DMSO)

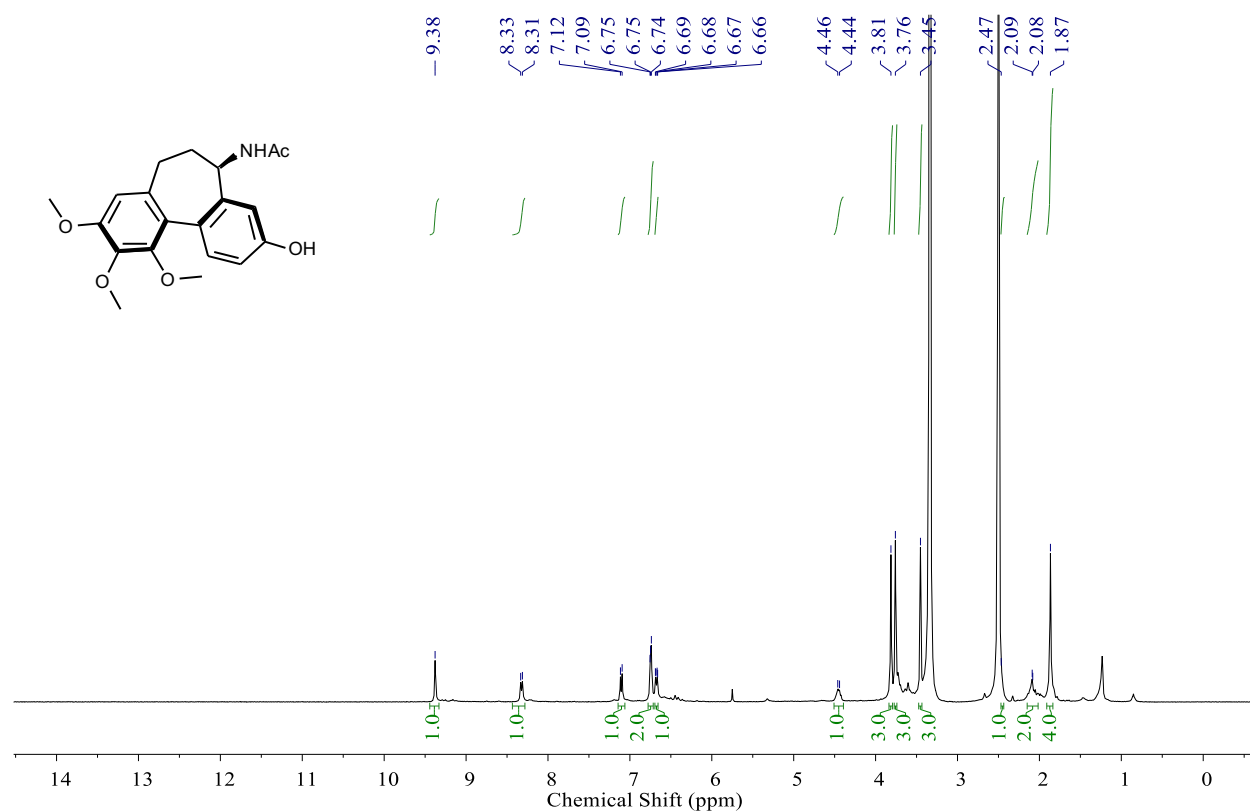

### 3, $^{13}\text{C}$ NMR (100 MHz, DMSO)

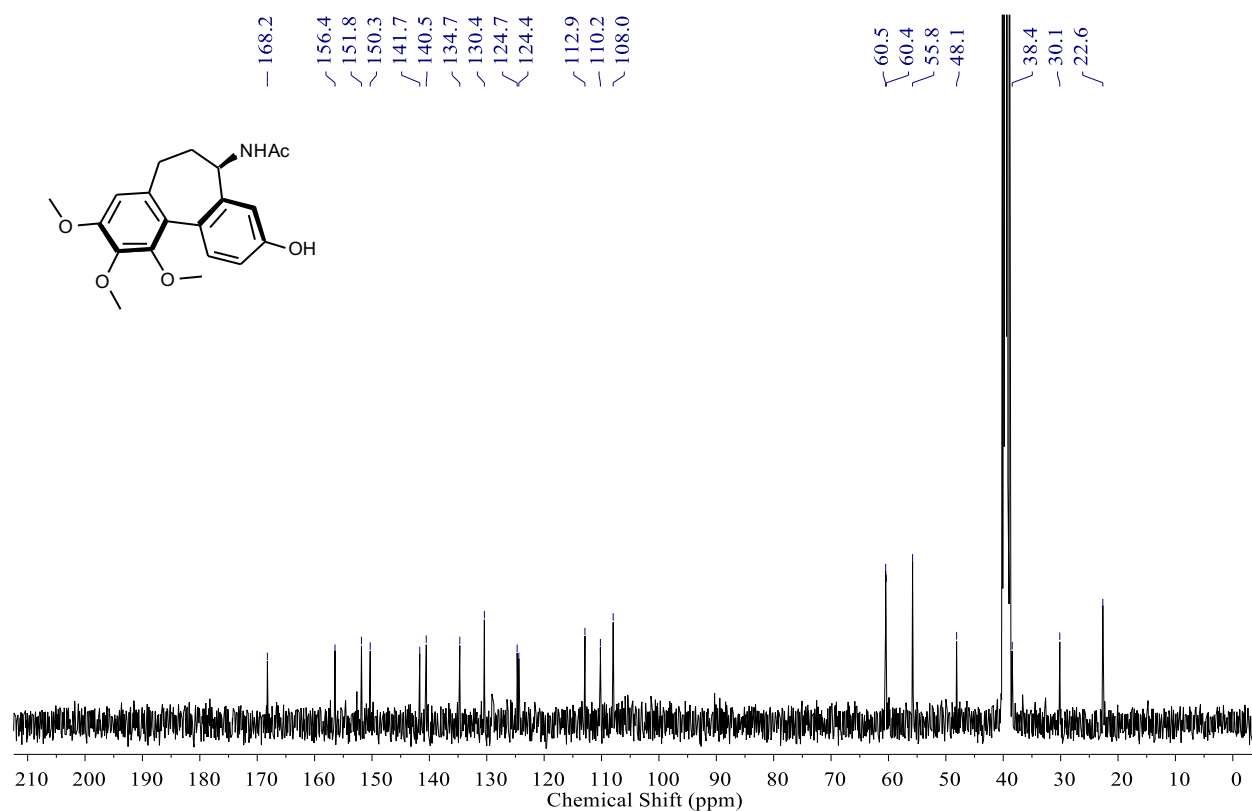

7, <sup>1</sup>H NMR (500 MHz, DMSO)

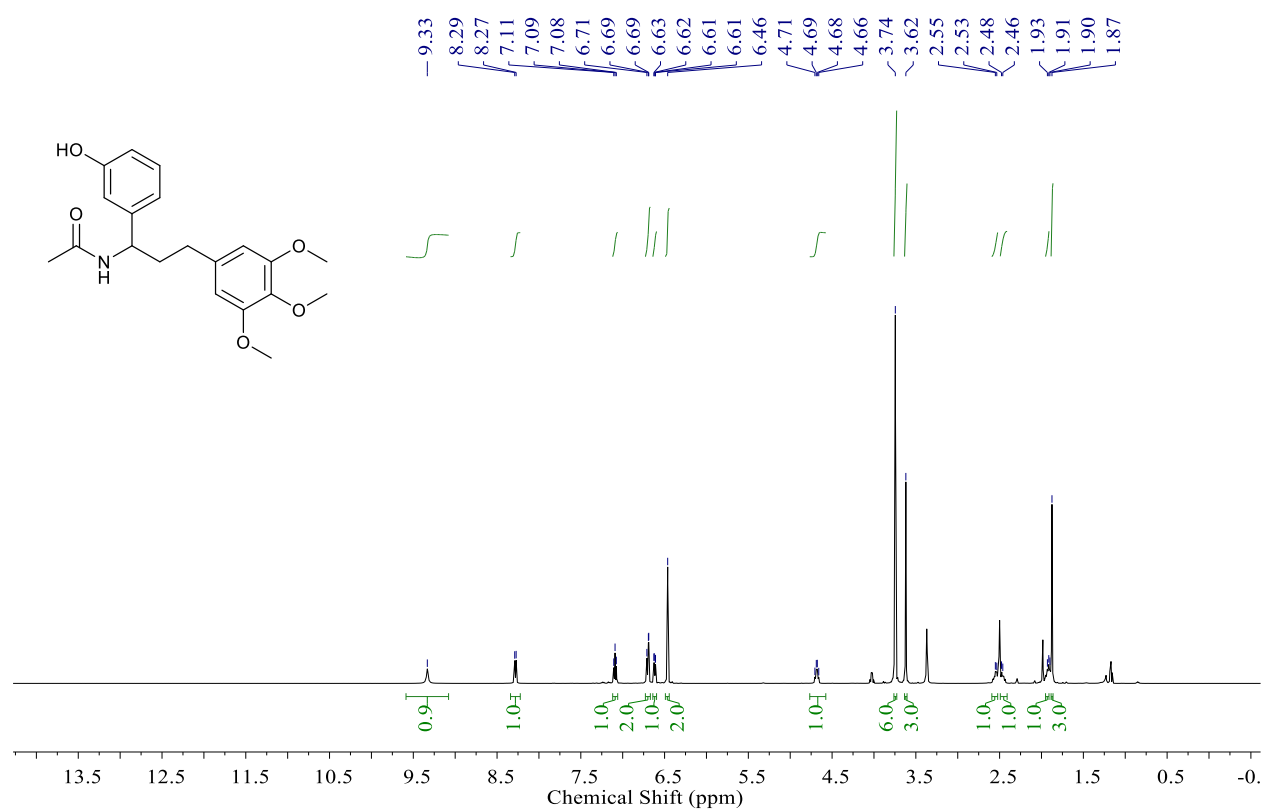

7, <sup>13</sup>C NMR (125 MHz, DMSO)

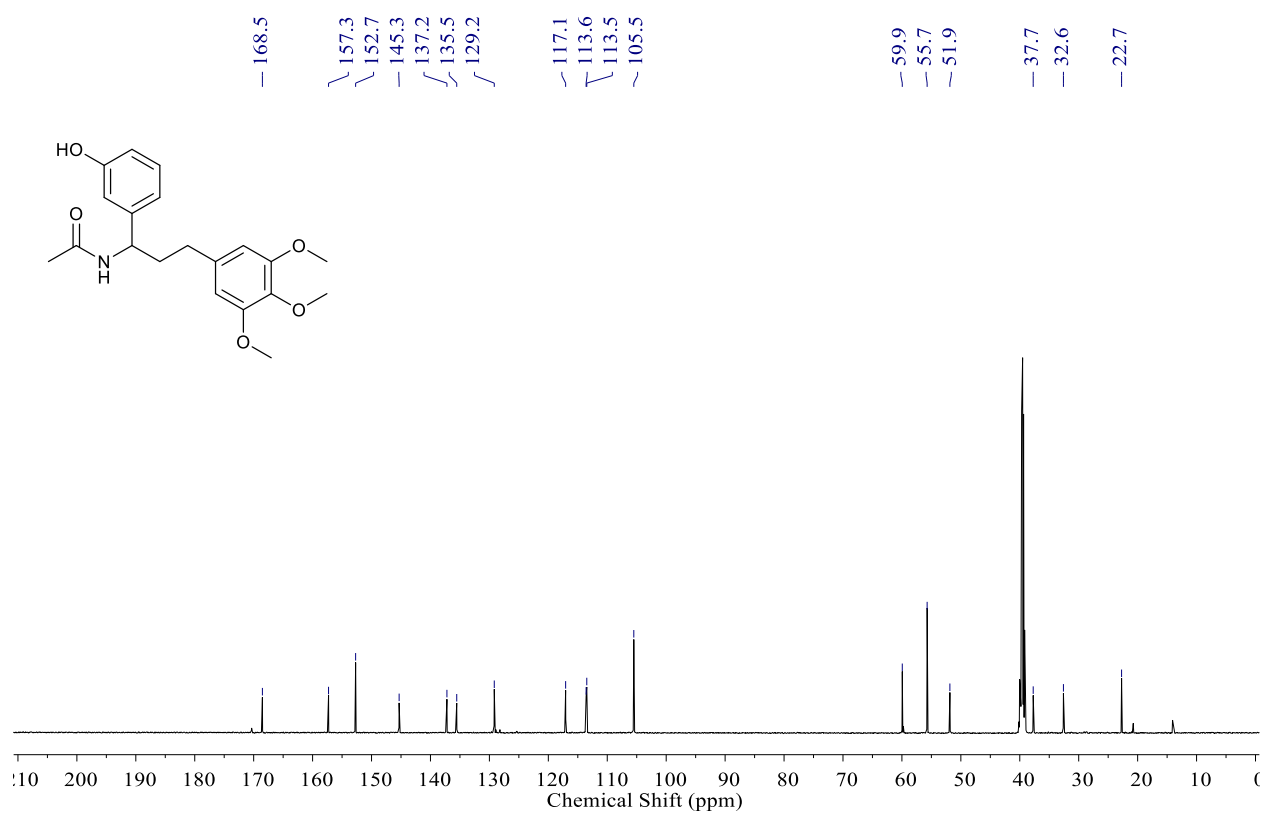

**10,  $^1\text{H}$  NMR (500 MHz, DMSO)**

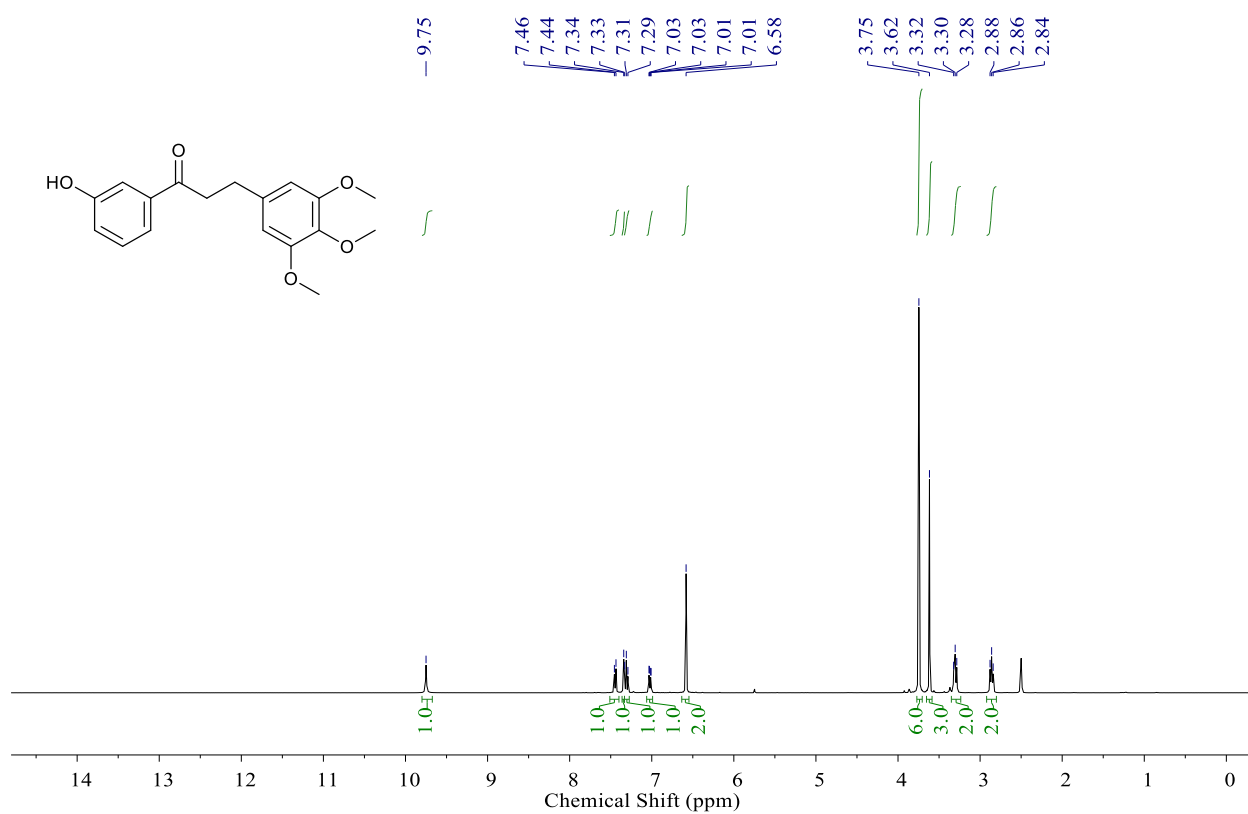

**10,  $^{13}\text{C}$  NMR (125 MHz, DMSO)**

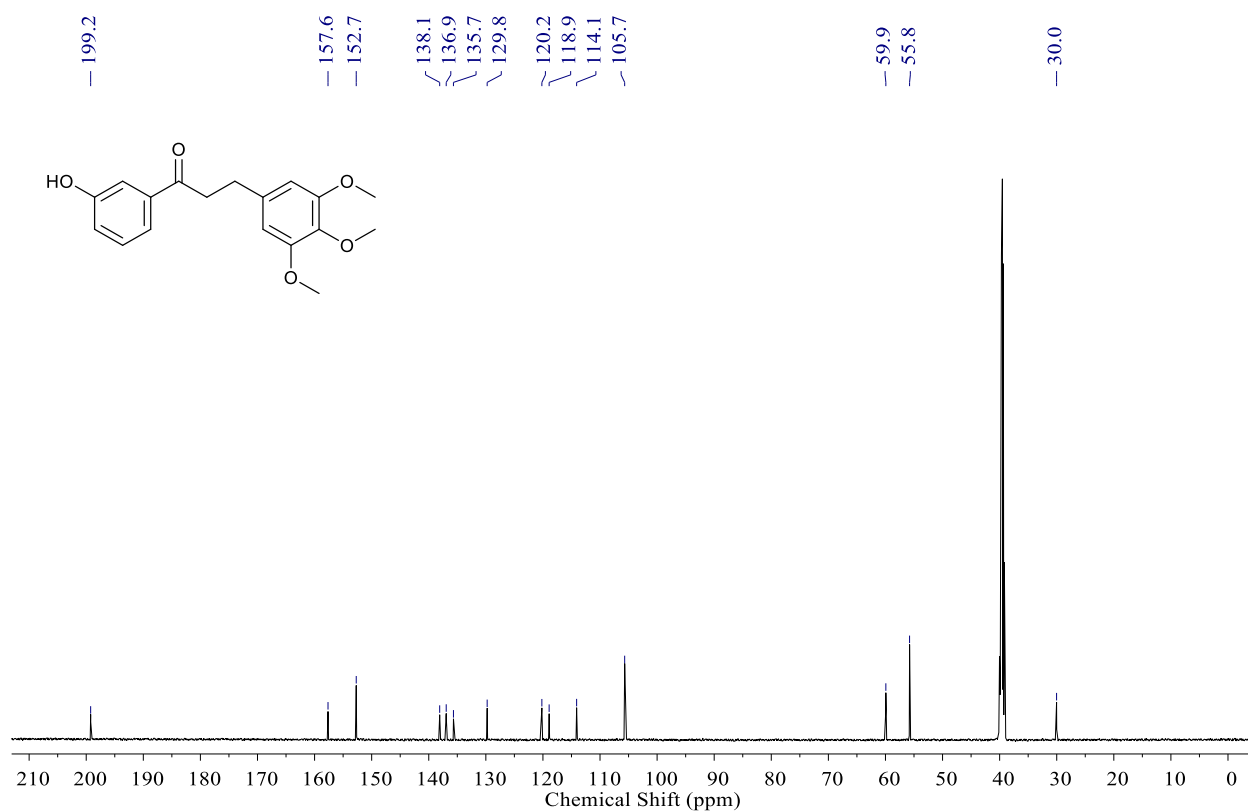

# 11, <sup>1</sup>H NMR (500 MHz, DMSO)

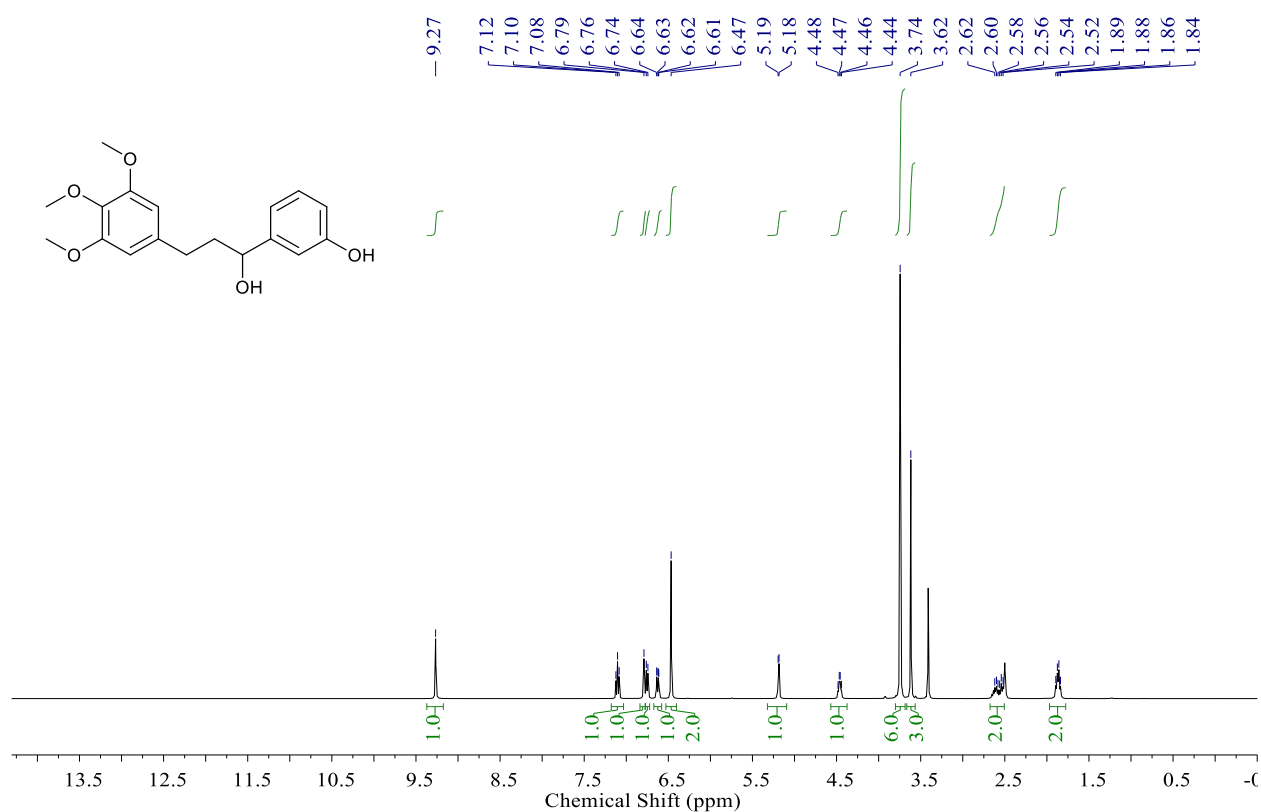

# 11, <sup>13</sup>C NMR (125 MHz, DMSO)

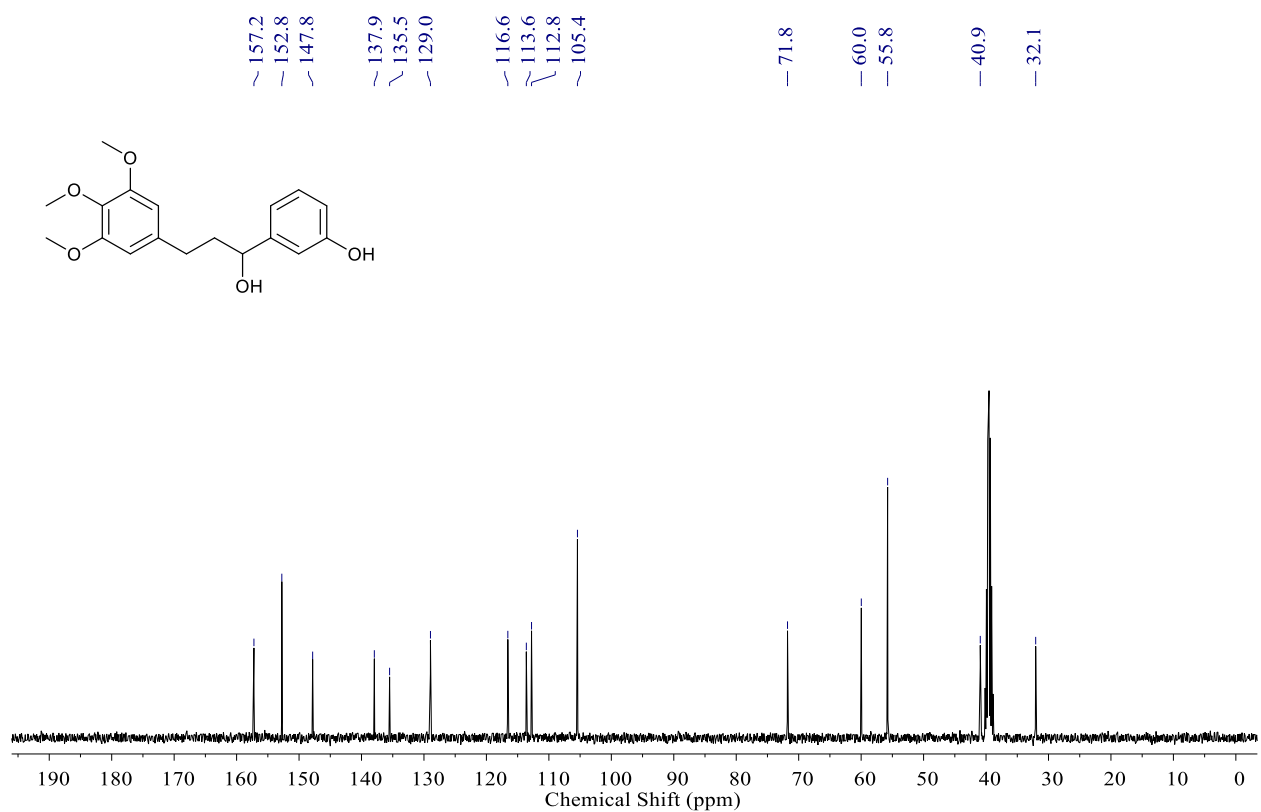

Chemical structure: COc1cc(OC)cc(C=Cc2ccc(O)cc2)c1

<sup>1</sup>H NMR spectrum (ppm):

- 9.76 (s, 1H, OH)
- 7.79, 7.76, 7.65, 7.62, 7.60, 7.59, 7.44, 7.43, 7.36, 7.34, 7.32, 7.18, 7.04, 7.03, 7.02 (aromatic protons, integration 1.0, 1.0, 1.0, 1.0, 1.0, 2.0, 1.0)
- 3.82 (s, 6H, OCH<sub>3</sub>)
- 3.68 (d, 3H, OCH<sub>3</sub>)

Chemical structure of 4-(4-hydroxyphenyl)-3-(3,4,5-trimethoxyphenyl)acryloyl chloride is shown. The <sup>13</sup>C NMR spectrum (CDCl<sub>3</sub>) displays the following chemical shifts (ppm): 189.2, 157.7, 153.1, 144.4, 139.8, 139.2, 130.3, 129.8, 121.5, 120.2, 119.6, 114.7, 106.5, 60.1, 56.1, and a solvent peak at 40 ppm.

**15,  $^1\text{H}$  NMR (400 MHz, DMSO)**

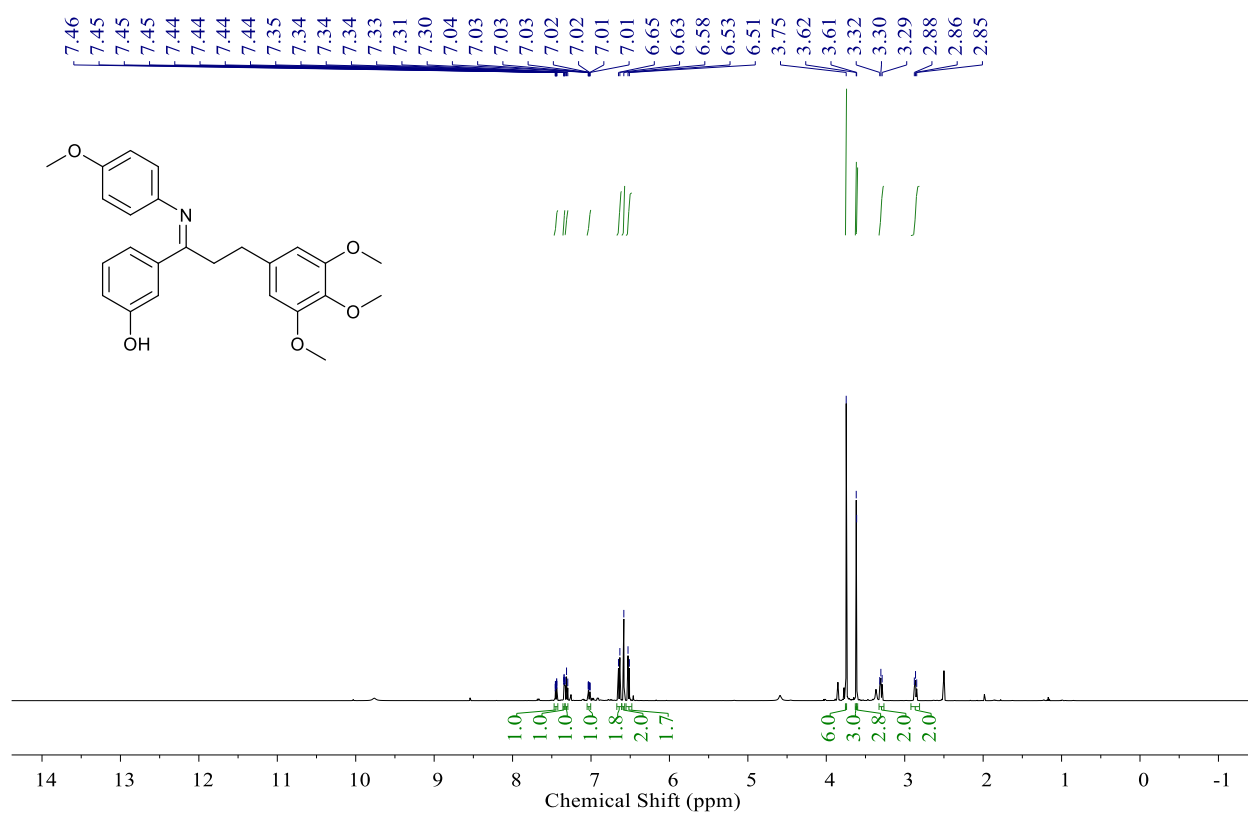

**15,  $^{13}\text{C}$  NMR (100 MHz, DMSO)**

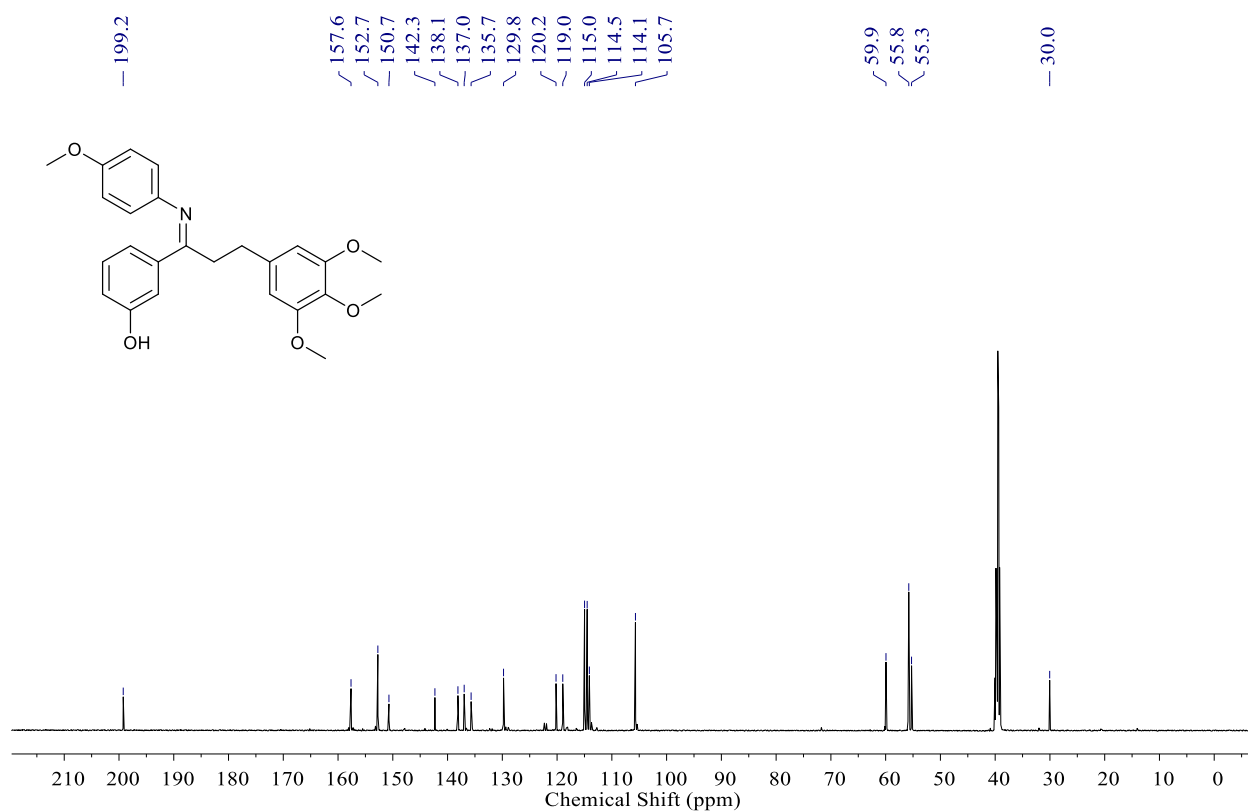

Chemical structure: (S)-1-(3,4,5-trimethoxyphenyl)-2-(4-hydroxyphenyl)ethan-1-amine

<sup>1</sup>H NMR spectrum (ppm):

- 9.22 (s, 1H, NH)
- 6.77 (d, 1H, ArH)
- 6.76 (d, 1H, ArH)
- 6.74 (d, 1H, ArH)
- 6.62 (d, 1H, ArH)
- 6.60 (d, 1H, ArH)
- 6.57 (d, 1H, ArH)
- 6.57 (d, 1H, ArH)
- 6.55 (d, 1H, ArH)
- 6.45 (d, 1H, ArH)
- 6.43 (d, 1H, ArH)
- 5.76 (s, 1H, NH)
- 5.74 (s, 1H, NH)
- 4.12 (m, 2H, CH<sub>2</sub>)
- 4.10 (m, 2H, CH<sub>2</sub>)
- 4.08 (m, 2H, CH<sub>2</sub>)
- 4.07 (m, 2H, CH<sub>2</sub>)
- 3.70 (m, 3H, OCH<sub>3</sub>)
- 3.61 (m, 3H, OCH<sub>3</sub>)
- 3.57 (m, 3H, OCH<sub>3</sub>)
- 2.68 (s, 1H, OH)
- 2.58 (s, 1H, OH)
- 1.99 (d, 2H, CH<sub>3</sub>)
- 1.89 (d, 2H, CH<sub>3</sub>)

Integration values (from left to right): 1.0, 1.0, 1.0, 2.0, 1.0, 1.0, 3.0, 1.0, 1.0, 1.0, 6.0, 3.0, 3.0, 1.0, 1.0, 1.1, 1.0.

Chemical structure of (S)-1-(3,4,5-trimethoxyphenyl)-3-(4-hydroxyphenyl)propan-1-amine is shown. The <sup>13</sup>C NMR spectrum displays peaks corresponding to the structure, with chemical shifts (ppm) labeled above the peaks:

- 157.3, 152.7, 150.4, 146.8, 142.5, 137.5, 135.5, 129.1, 117.3, 114.4, 113.5, 113.4, 113.2, 105.4
- 59.9, 57.0, 55.6, 55.3
- 32.7

**17,  $^1\text{H}$  NMR (400 MHz,  $\text{CDCl}_3$ )**

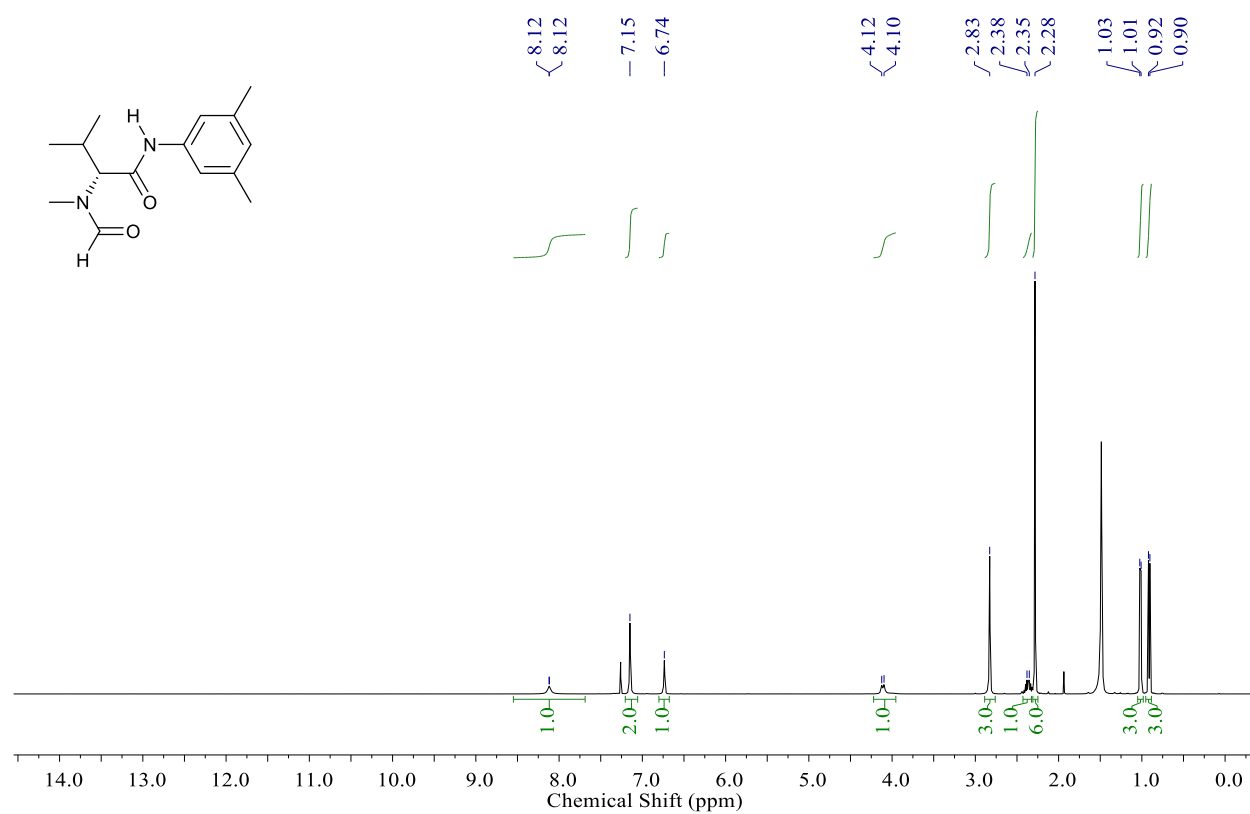

**17,  $^{13}\text{C}$  NMR (100 MHz,  $\text{CDCl}_3$ )**

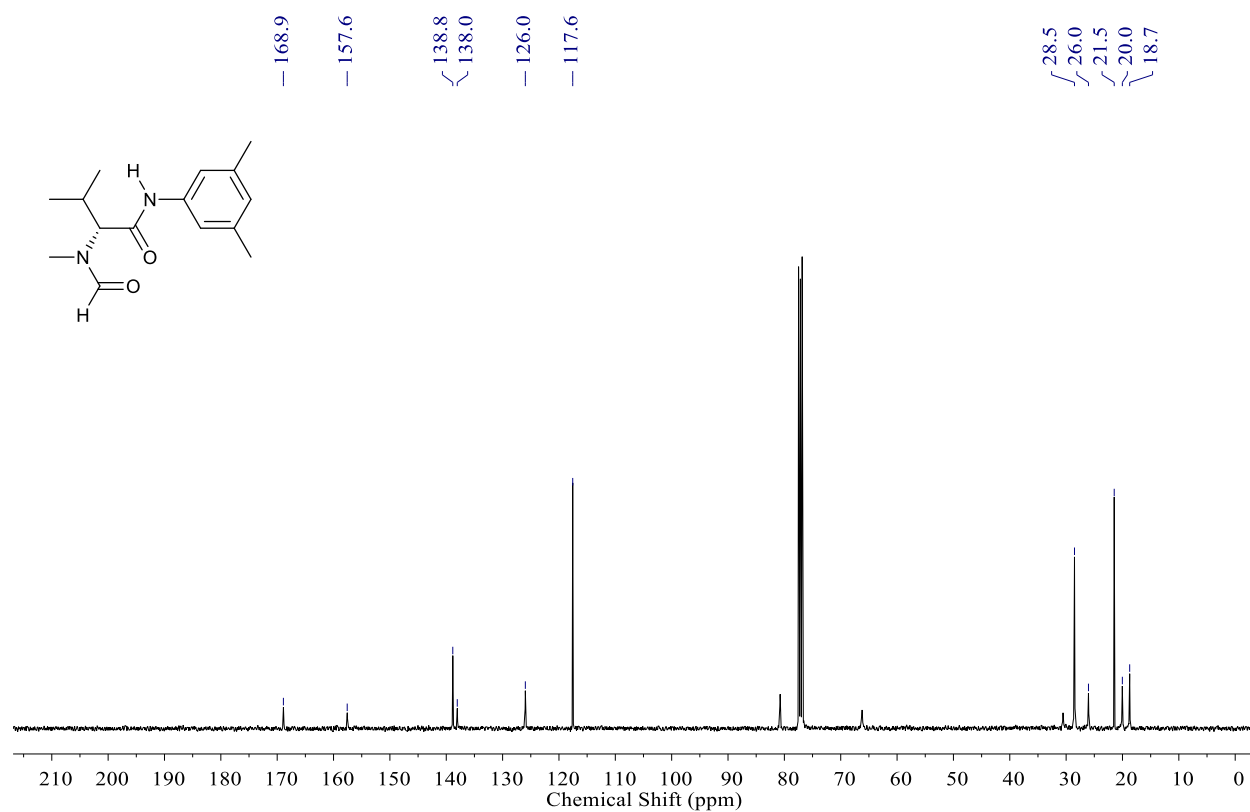

**19,  $^1\text{H}$  NMR (400 MHz, DMSO)**

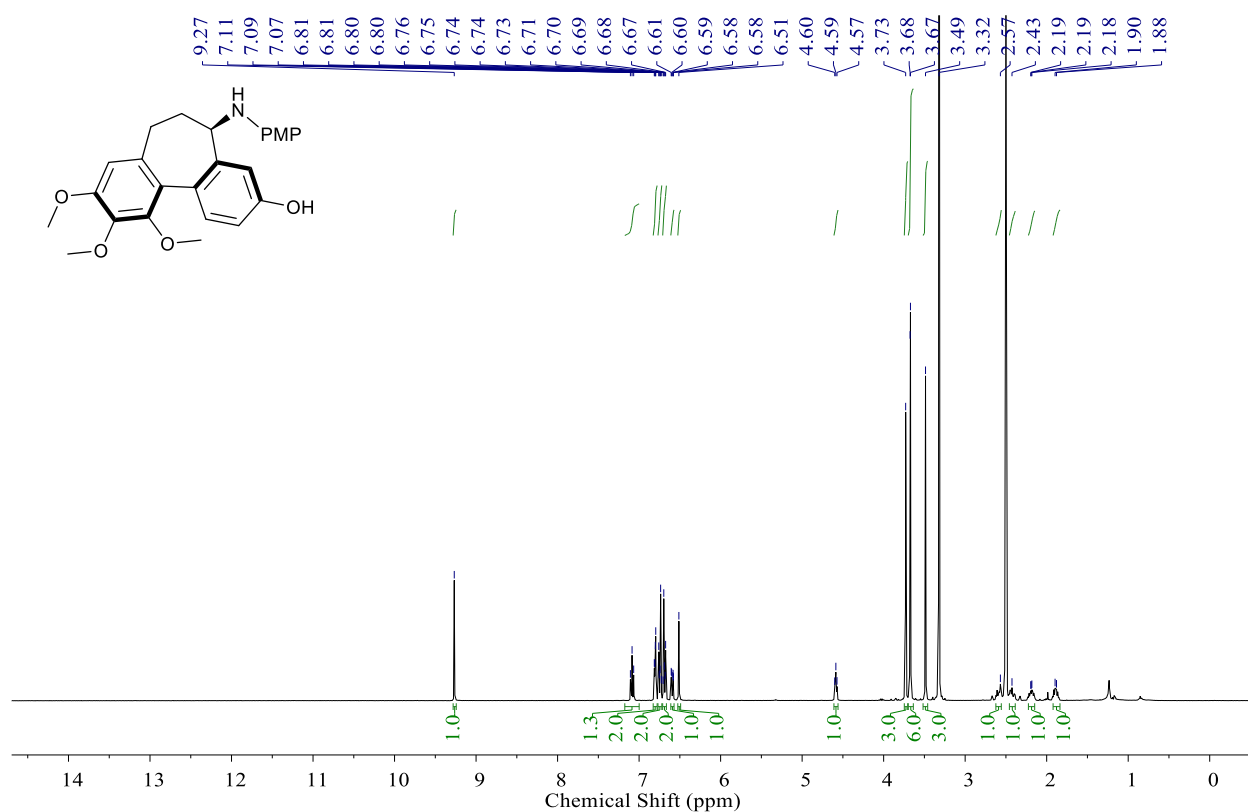

**19,  $^{13}\text{C}$  NMR (100 MHz, DMSO)**

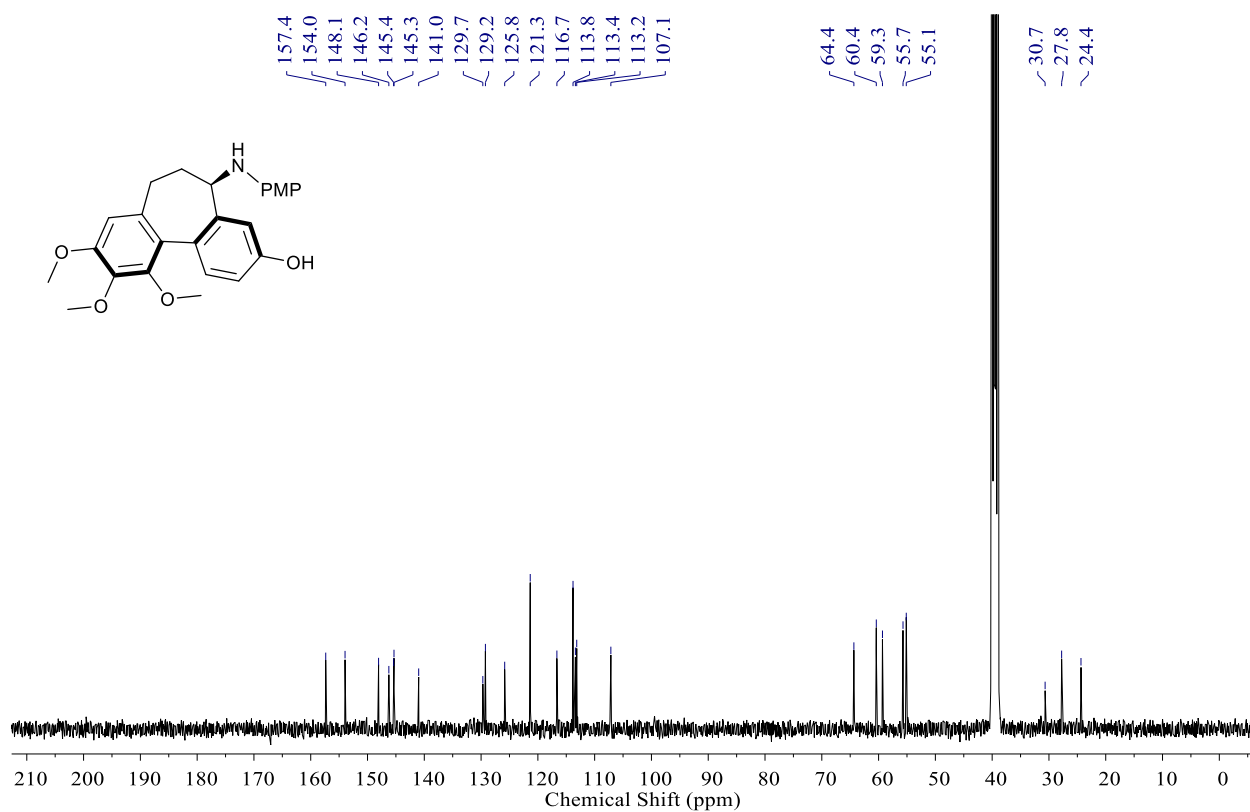

## 9. Chiral HPLC traces

**HPLC Condition:** Chiralpak IC, eluent: Hexane/Propan-2-ol (65:35); flow rate: 0.75 mL/min,  
**Racemic standard ( $\pm$ )-16a**

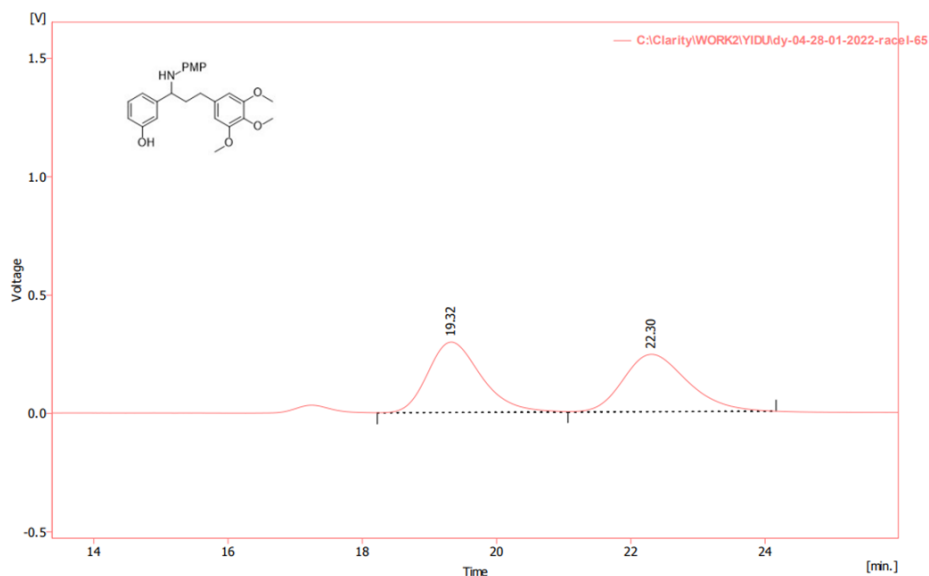

Result Table (Uncal - C:\Clarity\WORK2\YIDUDY-04-28-01-2022-race1-65)

|       | Reten. Time [min] | Area [mV.s] | Height [mV] | Area [%] | Height [%] | W05 [min] |
|-------|-------------------|-------------|-------------|----------|------------|-----------|
| 1     | 19.324            | 16437.922   | 297.594     | 50.4     | 55.1       | 0.84      |
| 2     | 22.304            | 16150.713   | 242.393     | 49.6     | 44.9       | 1.03      |
| Total |                   | 32588.636   | 539.986     | 100.0    | 100.0      |           |

**Enantioenriched (+)-16a, the reaction run at  $-30\text{ }^{\circ}\text{C}$**

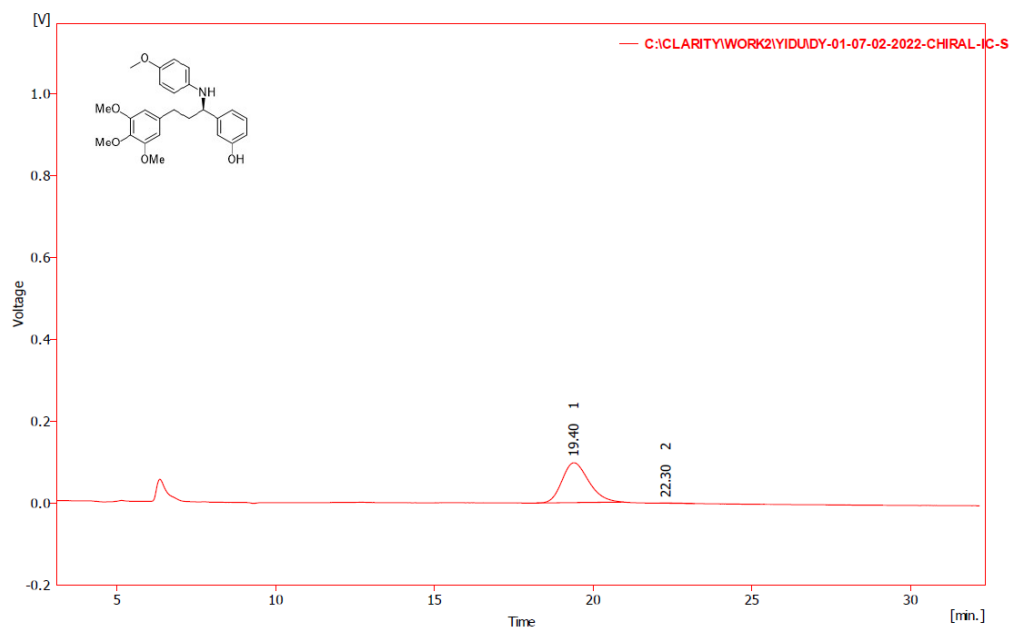

Result Table (Uncal - C:\CLARITY\WORK2\YIDUDY-01-07-02-2022-CHIRAL-IC-S)

|       | Reten. Time [min] | Area [mV.s] | Height [mV] | Area [%] | Height [%] | W05 [min] |
|-------|-------------------|-------------|-------------|----------|------------|-----------|
| 1     | 19.396            | 5705.325    | 97.596      | 99.6     | 99.6       | 0.91      |
| 2     | 22.300            | 23.691      | 0.392       | 0.4      | 0.4        | 0.30      |
| Total |                   | 5729.016    | 97.988      | 100.0    | 100.0      |           |

# Enantioenriched (+)-16a, the reaction run at RT

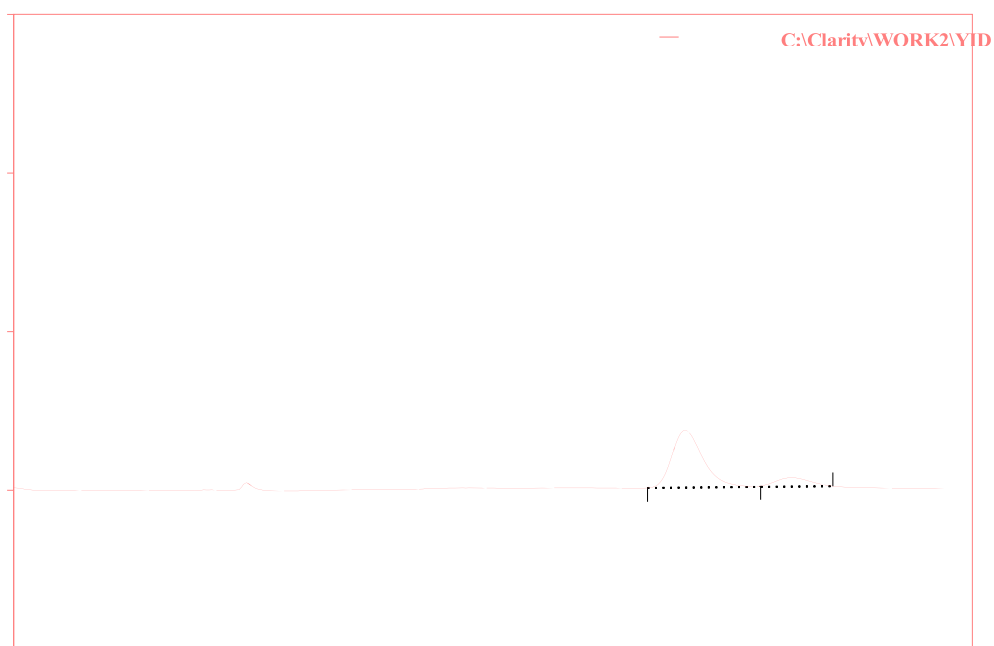

|   | Reten. Time<br>[min] | Area<br>[mV.s] | Height<br>[mV] | Area<br>[%] | Height<br>[%] | W05<br>[min] |
|---|----------------------|----------------|----------------|-------------|---------------|--------------|
| 1 | 19.836               | 22947.729      | 362.829        | 85.5        | 86.5          | 0.96         |
| 2 | 22.968               | 3905.325       | 56.560         | 14.5        | 13.5          | 1.14         |
|   | Total                | 26853.053      | 419.389        | 100.0       | 100.0         |              |

## References

- S1. K. Silbermann, C. P. Shah, N. U. Sahu, K. Juvale, S. M. Stefan, P. S. Kharkar and M. Wiese, *Eur. J. Med. Chem.*, 2019, **164**, 193-213.
- S2. N. Nicolaus, J. Reball, N. Sitnikov, J. Velder, A. Termath, A. Y. Fedorov and H.-G. Schmalz, *Heterocycles*, 2011, **82**, 1585-1600.
- S3. A. V. Malkov, S. Stončius, K. N. MacDougall, A. Mariani, G. D. McGeoch and P. Kočovský, *Tetrahedron*, 2006, **62**, 264-284.
